# Supplementary material for: Mesoporous alumina nanosheets and nanorolls derived from topologically identical Al-based MOFs
Source: Royal Society of Chemistry journal article supplement (doi:10.1039/c5ra02960k), 2015-01-01
Supplement: c5ra02960k1.pdf [file c5ra02960k1.pdf]

## Supplementary Information

### Mesoporous alumina nanosheets and nanorolls derived from topologically identical Al-based MOFs

Yi Liu\*, Shucheng Liu, and Zifeng Yue

#### Experimental

##### Synthesis of MIL-53 and DUT-5

MIL-53 template was synthesized by the solvothermal method. A mixture of  $\text{Al}(\text{NO}_3)_3 \cdot 9\text{H}_2\text{O}$  (1.326g), 1,4-benzenedicarboxylic acid (0.294g) and deionized water (20ml) was placed in a 50ml Teflon lined stainless steel autoclave and heated at 220°C for 72h. After filtering and washing with distilled water, a white powder was obtained. The excess terephthalic acid molecules in the pores were removed upon heating at 330°C for 48h in the air. Finally, an earth yellow powder was obtained.

DUT-5 template also was synthesized by the solvothermal method. Mixture of  $\text{Al}(\text{NO}_3)_3 \cdot 9\text{H}_2\text{O}$  (1.88g) and biphenyl-4,4'-dicarboxylic acid (0.8g) are solubilized in 60 ml of dimethylformamide(DMF). The solutions are homogenized for 20 min under sonication and afterwards heated for 24 h at 180 °C in a 200 ml Teflon lined stainless steel autoclave. After filtering and washing with DMF followed by activation at 200 °C under vacuum, a white powder was obtained.

##### Synthesis of alumina

For the synthesis of alumina derived from MIL-53 (denoted as Al/MIL), the as-made MIL-53 crystal was placed in a tube furnace under  $\text{N}_2$  gas flow at 550°C for 3h with a heating rate of 5°C/min. After that, the brown powder can be obtained. Then obtained carbon/alumina composite (denoted as C-Al/MIL) above was placed in a tube furnace at 650°C for 3 h in  $\text{O}_2$  gas with a heating rate of 5°C /min to remove the carbon residue. Finally, the white powder was obtained.

For the synthesis of alumina derived from DUT-5 (denoted as Al/DUT), the as-made DUT-5 crystal was placed in a tube furnace under  $\text{N}_2$  gas flow at 700°C for 3 h with a heating rate of 5°C/min. After that, the black powder can be obtained. Then

obtained carbon/alumina composite (denoted as C-Al/DUT) was placed in a tube furnace at 650°C for 3 h in O<sub>2</sub> gas with a heating rate of 5°C /min to remove the carbon residue. Finally, the white powder can be obtained.

## Physical Measurements

X-ray diffraction (XRD) data of samples were collected by using X-ray diffractometer (D/max-2200) with CuK $\alpha$  radiation at room temperature. Transmission electron microscopic (TEM) investigations were carried out using an instrument (JEOL.JEM-2000FXII) operated at 160 kV accelerating voltage. Nitrogen adsorption/desorption isotherms were measured at 77 K using surface area and pore size analyzer (3H-2000PS2). CO<sub>2</sub> adsorption/desorption isotherms were measured at 273 K using PS2-M351 analyzer.

Table S1 The BET surface area( $S_{BET}$ ), total pore volume( $V_t$ ) and average pore diameter( $D_p$ ) of samples derived from MIL-53 and DUT-5

| Sample   | $S_{BET}(m^2g^{-1})$ | $V_t(cm^3g^{-1})$ | $D_p(nm)$ |
|----------|----------------------|-------------------|-----------|
| C-Al/MIL | 78.8                 | 0.331             | 16.82     |
| Al/MIL   | 88.6                 | 0.259             | 11.74     |
| C-Al/DUT | 253.9                | 0.823             | 12.96     |
| Al/DUT   | 269.9                | 1.397             | 20.70     |

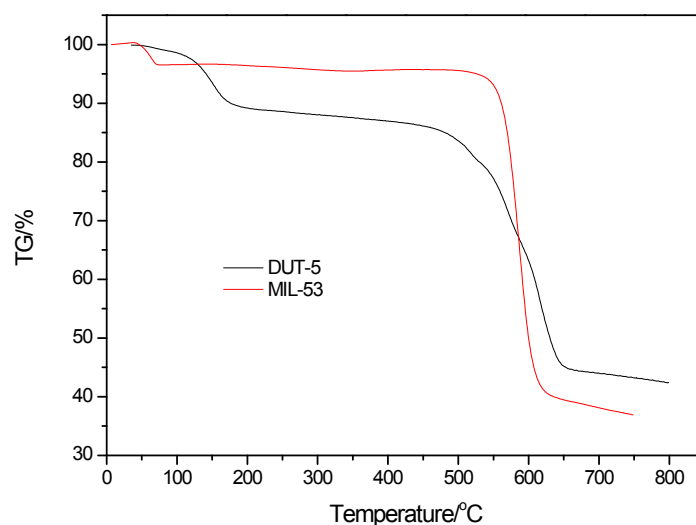

Fig. S1 TG curve of MIL-53 and DUT-5

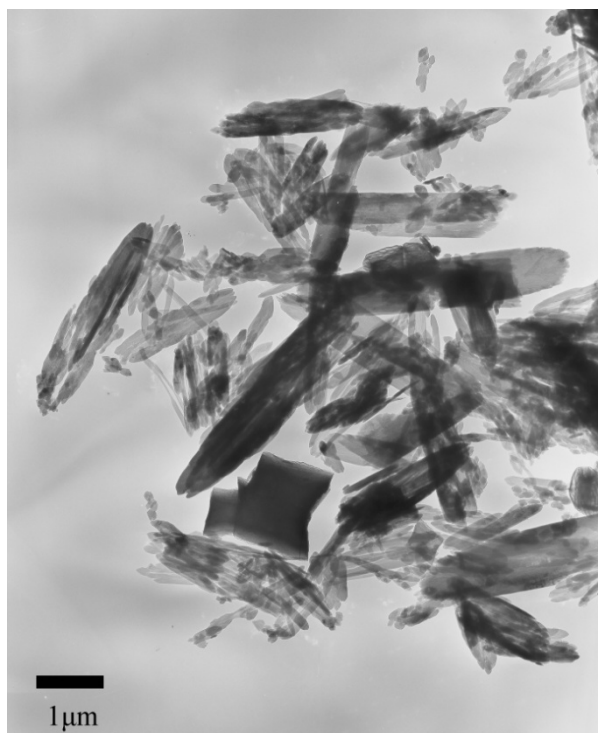

Fig. S2 TEM of C-Al/MIL

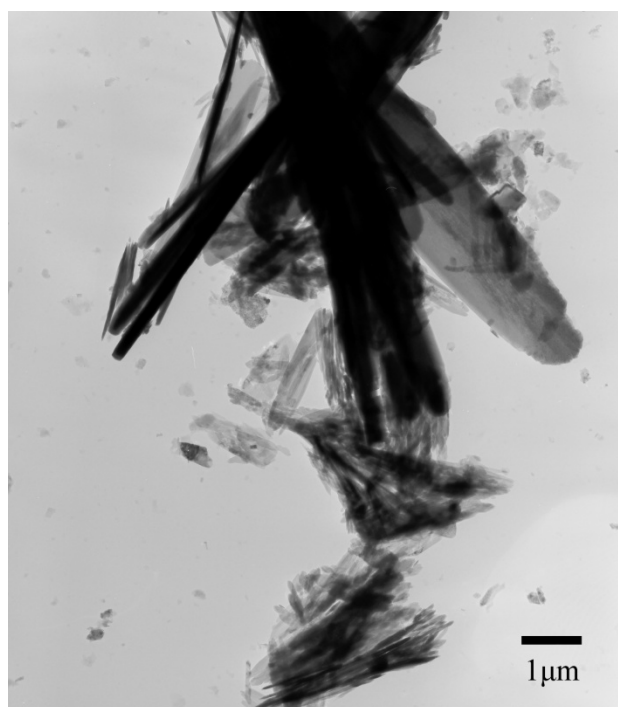

Fig. S3 TEM of Al/MIL

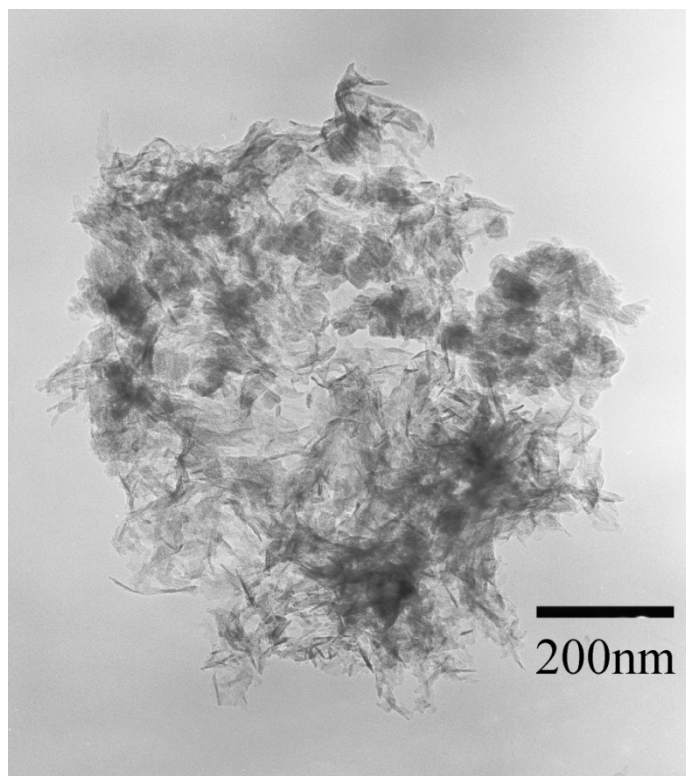

Fig. S4 TEM of C-Al/DUT

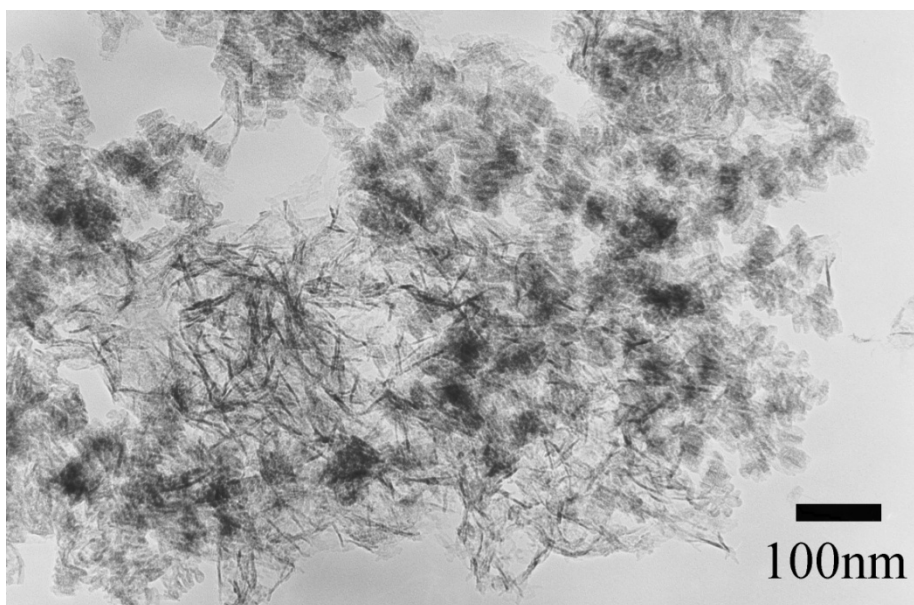

Fig. S5 TEM of Al/DUT
